## RESEARCH ARTICLE

# A fitness cost resulting from *Hamiltonella defensa* infection is associated with altered probing and feeding behaviour in *Rhopalosiphum padi*

Daniel J. Leybourne<sup>1,2,3</sup>, Tracy A. Valentine<sup>3</sup>, Jorunn I. B. Bos<sup>1,2</sup> and Alison J. Karley<sup>3,\*</sup>

## ABSTRACT

Many herbivorous arthropods, including aphids, frequently associate with facultative endosymbiotic bacteria, which influence arthropod physiology and fitness. In aphids, endosymbionts can increase resistance against natural enemies, enhance aphid virulence and alter aphid fitness. Here, we used the electrical penetration graph technique to uncover physiological processes at the insect–plant interface affected by endosymbiont infection. We monitored the feeding and probing behaviour of four independent clonal lines of the cereal-feeding aphid *Rhopalosiphum padi* derived from the same multilocus genotype containing differential infection (+/–) with a common facultative endosymbiont, *Hamiltonella defensa*. Aphid feeding was examined on a partially resistant wild relative of barley known to impair aphid fitness and a susceptible commercial barley cultivar. Compared with uninfected aphids, endosymbiont-infected aphids on both plant species exhibited a twofold increase in the number of plant cell punctures, a 50% reduction in the duration of each cellular puncture and a twofold higher probability of achieving sustained phloem ingestion. Feeding behaviour was also altered by host plant identity: endosymbiont-infected aphids spent less time probing plant tissue, required twice as many probes to reach the phloem and showed a 44% reduction in phloem ingestion when feeding on the wild barley relative compared with the susceptible commercial cultivar. Reduced feeding success could explain the 22% reduction in growth of *H. defensa*-infected aphids measured on the wild barley relative. This study provides the first demonstration of mechanisms at the aphid–plant interface contributing to physiological effects of endosymbiont infection on aphid fitness, through altered feeding processes on different quality host plants.

**KEY WORDS:** Electrical penetration graph, EPG, Facultative endosymbiont, Insect physiology, Symbiosis

## INTRODUCTION

Infection with facultative (non-essential) endosymbiotic bacteria is widespread within herbivorous arthropod populations, including aphids (Luna et al., 2018), whiteflies (Ghosh et al., 2018), psyllids (Hansen et al., 2012), mites (Zhu et al., 2018) and weevils (Morera-Margarit et al., 2019). Many of these herbivorous arthropods are

important agricultural and horticultural pests, and, therefore, understanding the effects of symbiont infection on arthropod fitness, arthropod pest status and the interactions between multiple trophic levels is a dynamic area of research (Oliver et al., 2014; McLean et al., 2016; Zytynska and Meyer, 2019). A wealth of studies have focused on aphids which, because of their abundance and near-worldwide distribution (Van Emden and Harrington, 2017), are a particularly relevant group for elucidating the role of facultative endosymbionts in herbivorous pests. While many studies have described the effects on aphid fitness of several endosymbiotic bacteria (Oliver et al., 2003; Moran et al., 2005; Russell and Moran, 2006; Degnan and Moran, 2008; Vorburger and Gousskov, 2011; Wulff and White, 2015; Mathé-Hubert et al., 2019), few have attempted to elucidate the underlying physiological mechanisms. Recent observations of endosymbiont-associated changes in aphid probing (Angelella et al., 2018), plant resource allocation (Bennett et al., 2016) plant phytohormone accumulation (Li et al., 2019) and plant volatile emission (Frago et al., 2017) have hinted that endosymbionts could alter processes at the aphid–plant interface, with similar observations reported for other herbivorous arthropods, including whiteflies (Su et al., 2015). More detailed comparative studies are needed, however, to confirm the mechanism(s) through which facultative endosymbionts manipulate physiological interactions between herbivorous pests and their host plants.

To feed, aphids probe plants using specialised piercing and sucking mouthparts known as stylets, with the aim of establishing a feeding site in the plant phloem. While probing plant tissues, aphids can transmit plant viruses (Powell, 2005; Moreno et al., 2012). Infection with aphid-transmitted viruses is a significant cause of economic crop loss, often resulting in yield losses which can exceed 80% (Perry et al., 2000; Murray and Brennan, 2010). Most aphid species harbour the obligate bacterial endosymbiont *Buchnera aphidicola*, which supplies aphids with essential amino acids they are unable to biosynthesise (Sasaki et al., 1991; Douglas and Prosser, 1992; Shigenobu et al., 2000; Hansen and Moran, 2011). Additional co-obligatory symbiotic relationships have been described with other endosymbiont species, including *Wolbachia* sp. in the banana aphid, *Pentalonia nigronervosa* (De Clerck et al., 2015; Manzano-Marín, 2019 preprint) and with *Serratia symbiotica* in multiple species of the *Cinara* genus (Meseguer et al., 2017). In most other aphid species, however, these co-infecting endosymbionts are not essential for survival. Alongside obligatory endosymbiotic relationships, aphids can form facultative endosymbiotic relationships with a range of microorganisms.

The diversity and frequency of infection with facultative endosymbionts can vary considerably between and within aphid species (de la Peña et al., 2014; Henry et al., 2015; Zytynska and Weisser, 2016; Guo et al., 2019). The 11 most common facultative endosymbionts are *Hamiltonella defensa*, *Regiella insecticola*,

<sup>1</sup>Division of Plant Sciences, School of Life Sciences, University of Dundee, Dundee DD2 5DA, UK. <sup>2</sup>Cell and Molecular Sciences, The James Hutton Institute, Invergowrie, Dundee DD2 5DA, UK. <sup>3</sup>Ecological Sciences, The James Hutton Institute, Invergowrie, Dundee DD2 5DA, UK.

\*Author for correspondence (alison.karley@hutton.ac.uk)

 D.J.L., 0000-0001-5836-3849; T.A.V., 0000-0002-9064-2896; A.J.K., 0000-0002-0252-2086

*S. symbiotica*, *Rickettsia* sp., *Rickettsiella* sp., the Pea Aphid X-type Symbiont (PAXS; occasionally classified as *Candidatus* Fukatsuiia symbiotica), *Spiroplasma* sp., *Wolbachia* sp., *Arsenophonus* sp., *Sitobion miscanthis* L-type Symbiont (SMLS) and *Orientia-Like Organism* (OLO) (Oliver et al., 2006; Castañeda et al., 2010; Tsuchida et al., 2010; Łukasik et al., 2013a; de la Peña et al., 2014; Leybourne et al., 2020). Several of these facultative endosymbionts, including *H. defensa* and *Rickettsia* sp., can infect other important agricultural pests, including whiteflies (Brumin et al., 2011; Su et al., 2015; Zytynska et al., 2019 preprint). An analysis of the endosymbiont infection frequencies of aphids by Zytynska and Weisser (2016) assessed the proportion of aphid species harbouring *H. defensa*, *R. insecticola*, *S. symbiotica*, *Rickettsia* sp., *Spiroplasma* sp., PAXS, *Arsenophonus* sp. and *Wolbachia* sp. infections, and showed that the frequency of endosymbiont infection can vary widely, with *Serratia symbiotica* as the most frequently detected endosymbiont in aphids (47% of the 156 aphid species tested were infected) and *Arsenophonus* sp. as the least frequently detected (7% of the 131 aphid species tested were infected) (Zytynska and Weisser, 2016).

The benefits of aphid infection with nine of these endosymbionts have recently been reviewed by Guo et al. (2017) and a meta-analysis of the costs and benefits of facultative endosymbiont infection has recently been conducted by Zytynska et al. (2019 preprint). Beneficial traits conferred to the aphid by the endosymbionts include protection against parasitism by Braconidae wasps (*H. defensa* and *R. insecticola*; Hansen et al., 2012; Leybourne et al., 2020), protection against entomopathogenic fungi (*R. insecticola*, *Rickettsia* sp., *Rickettsiella* sp. and *Spiroplasma* sp.; Łukasik et al., 2013b), host-plant adaptation (*Arsenophonus* sp.; Wagner et al., 2015), heat tolerance (*S. symbiotica* and *H. defensa*, alongside *B. aphidicola* mutations; Russell and Moran, 2006; Dunbar et al., 2007), morphological changes in insect colour (*Rickettsiella* sp.; Tsuchida et al., 2010; Nikoh et al., 2018) and enhanced aphid virulence (mixed symbiont communities; Luna et al., 2018). Infection with endosymbionts can, however, result in negative fitness consequences for the aphid host, including decreased growth (*Rickettsia* sp.; Sakurai et al., 2005), reduced fecundity (*Spiroplasma* sp., *H. defensa* and *S. symbiotica*; Chen et al., 2000; Castañeda et al., 2010; Li et al., 2018; Mathé-Hubert et al., 2019), shorter aphid lifespan (*Spiroplasma* sp. and *S. symbiotica*; Chen et al., 2000; Mathé-Hubert et al., 2019), lower adult mass (*S. symbiotica*; Skaljic et al., 2018) and increased susceptibility to insecticides (*S. symbiotica*; Skaljic et al., 2018). Endosymbiont effects can depend on host plant factors, including the nutritional quality of the host plant (Chandler et al., 2008), host plant resistance against aphids (Leybourne et al., 2020) and other plant traits that underpin aphid biotype specialisation on particular host plant species (Wagner et al., 2015; Sochard et al., 2019). These observations highlight the importance of investigating how endosymbiont infection and host plant suitability for aphids interact to influence processes at the aphid-plant interface.

Around one-third of 154 aphid species assessed for endosymbiont presence have been reported to harbour *H. defensa* (Zytynska and Weisser, 2016). Amongst cereal-feeding aphids, the proportion of bird-cherry oat aphid (*Rhopalosiphum padi*) populations infected with the defensive endosymbiont *H. defensa* is around 10.8% (63/585 individuals; Guo et al., 2019). The primary trait conferred to aphids infected with *H. defensa* is protection against parasitism by Braconidae wasps (Oliver and Higashi, 2019). Additionally, *H. defensa* infection can have a more direct effect on aphid biology: a recent study has shown that *H. defensa* infection can alter the

interactions which occur between aphids and their host plants by influencing aphid probing behaviour (Angelella et al., 2018). This observation suggests that altered aphid probing behaviour could affect aphid fitness by altering feeding success. Indeed, *H. defensa* infection has been shown to have consequences for aphid fitness (Castañeda et al., 2010; Vorburger and Gouskov, 2011; Li et al., 2018; Zytynska et al., 2019 preprint). Examining these symbiont effects in relation to aphid probing behaviour could elucidate the mechanistic processes which contribute towards symbiont-associated fitness consequences, including those which are only observed when host plant nutritional quality decreases (e.g. Chandler et al., 2008; Leybourne et al., 2020).

The electrical penetration graph (EPG) technique is an electrophysiological tool used to monitor the probing and feeding behaviour of sap-feeding insects (Tjallingii, 1985; Tjallingii and Esch, 1993; Prado and Tjallingii, 1994) and has been used successfully to monitor the feeding and probing behaviour of aphids (Greenslade et al., 2016), whiteflies (Chesnais and Mauck, 2018), psyllids (Civolani et al., 2011) and planthoppers (He et al., 2011). The technique is based on an electrical circuit which is made by inserting conductive copper probes into the soil around the plant and adhering conductive wire onto the dorsum of the aphids (Tjallingii, 1978, 1985). Both probes are connected to a data logger and computational software. An electrical current is passed through the circuit, which is closed when the aphid stylet comes into contact with plant tissue, and the resulting electrical waveforms can be characterised to provide information on aphid stylet activities (probing and feeding behaviour) (Kimmins and Tjallingii, 1985; Tjallingii and Esch, 1993; Prado and Tjallingii, 1994; Tjallingii et al., 2010). Different electrical waveforms obtained from EPG recordings correspond with stylet activities within different plant tissues (Sarria et al., 2009), including the mesophyll and vascular tissue (these are detailed in Materials and Methods, below). A primary use of the EPG technique has been to identify plant tissue types involved in plant resistance against sap-feeding pests (Alvarez et al., 2006; Greenslade et al., 2016; Leybourne et al., 2019). However, the EPG technique can also be employed to examine insect physiological responses to a myriad of biotic and abiotic factors, such as environmental stress (Ponder et al., 2000), plant disease status (Angelella et al., 2018), plant association with mycorrhiza (Simon et al., 2017) and disruption of the obligate aphid endosymbiont *B. aphidicola* (Machado-Assef and Alvarez, 2018).

In the current study, we used the EPG technique to examine aphid feeding on two host plant species of contrasting quality for aphids: a susceptible modern cultivar of barley, *Hordeum vulgare* cv. Concerto, and a wild relative of barley with partial resistance against aphids, *H. spontaneum* 5 (Hsp5) (Delp et al., 2009). The mechanism of partial resistance against aphids in Hsp5 has been characterised previously, with resistance factors located in the mesophyll (elevated defence gene and phytohormone-regulated gene expression) and phloem (decreased phloem sap nutritional quality) (Leybourne et al., 2019). Hsp5 is particularly unsuitable as a host for *H. defensa*-infected *R. padi*, causing impaired aphid growth (Leybourne et al., 2020), although the mechanism of decreased fitness has not been investigated empirically. Comparative studies of endosymbiont effects on aphid physiology depend on access to aphid lines with a common genetic background that are differentially infected with the target symbiont, achieved either by curing or transfecting aphids (Wagner et al., 2015; Mathé-Hubert et al., 2019), or, as in this study, making use of aphid genotypes that vary naturally in their infection status (Sochard et al., 2019; Leybourne et al., 2020). Here, we

analysed aphid feeding behaviour to test two complementary hypotheses: (1) that infection with *H. defensa* can lead to altered aphid probing and feeding; (2) that differential aphid probing and feeding between uninfected and *H. defensa*-infected aphids is a key contributor towards the decreased fitness of *H. defensa*-infected aphids on partially resistant Hsp5. We discuss how the findings enhance our understanding of the mechanisms underpinning plant–insect herbivore interactions and the influence of insect endosymbionts on the outcome of these interactions.

## MATERIALS AND METHODS

### Plant growth and aphid rearing conditions

Barley seeds, *Hordeum vulgare* cv. Concerto (Linnaeus) (Concerto), and wild barley seeds, *H. spontaneum* (Linnaeus) 5 (Hsp5), were surface sterilised by washing in 2% (v/v) hypochlorite solution and rinsed in deionised water. Concerto seeds were kept in the dark at room temperature for 48 h to germinate whereas Hsp5 seeds were incubated at 4°C in the dark for 14 days to synchronise germination. Plants were grown to the true-leaf stage of development (1.2 on the scale described in Zadoks et al., 1974; ca. 7–10 days old) before use in aphid fitness and EPG experiments.

Asexual laboratory clonal cultures of the bird cherry-oat aphid, *Rhopalosiphum padi* (Linnaeus), were reared on 1 week old barley seedlings (cultivar Optic) contained in ventilated cups and maintained at 18±2°C and 16 h:8 h (day:night). Aphid lines were reared on a different barley cultivar to prevent prior habituation to the experimental treatments. *Rhopalosiphum padi* lines were previously genotyped and characterised for the presence of facultative endosymbionts (Leybourne et al., 2020). Aphid lines were represented by one aphid genotype (E) with differential infection with the aphid endosymbiont *H. defensa* (Moran et al., 2005): DL 16/04 (*Hd*+), DL 16/05 (*Hd*+), DL 16/06 (*Hd*–) and DL 16/13 (*Hd*–). Prior to experimentation, DNA was extracted from aphid cultures using the Qiagen Plant DNA Extraction Kit and the presence of *H. defensa* was confirmed by PCR on a ProFlex PCR system (Applied Biosystems) with PCR conditions as follows: 95°C for 2 min followed by 35 cycles of 95°C for 30 s, 55°C for 30 s and 72°C for 3 min, with a final extension stage of 72°C for 5 min; the final reaction solution consisted of 1× Green GoTaq® reaction buffer (Promega) containing 1 μmol forward primer (PABSF: 5'-AGCGCAGTTTACTGAGTTCA-3'; Darby and Douglas, 2003), 1 μmol reverse primer (16SB1 5'-TACGGYTACCTTGTTACGA-CTT-3'; Fukatsu et al., 2000), 1.25 U GoTaq® DNA Polymerase (Promega) and 1.5 mmol MgCl<sub>2</sub>.

### EPG aphid feeding assessment

The DC-EPG technique (Tjallingii, 1978, 1988) was employed to monitor probing and feeding behaviour of the four *R. padi* lines described above. Recordings were taken over a 6 h period using a Giga-4 DC-EPG device (EPG Systems, Wageningen, The Netherlands). Aphids were adhered to aphid probes (a copper wire, 3 cm×0.2 cm, soldered to a brass pin, tip width 0.2 cm) by attaching 3 cm of gold wire (20 μm diameter; EPG Systems) to the aphid probe using water-based silver glue (EPG Systems) and adhering the free end of the wire to the aphid dorsum using the same water-based adhesive. A plant probe (copper rod approximately 5 cm×0.5 cm) was created by soldering the copper rod to electrical wire extending from the plant voltage output of the Giga-4 device. The wired aphid was attached to the Giga-4 device by placing the end of the brass pin into the EPG probe and the copper rod was then placed into the plant soil. Recordings were taken with a 1 GΩ input resistance and a 50× gain (Tjallingii, 1988), for 6 h per read. The

order of *R. padi*–plant combinations and allocation to EPG probe was randomised, and Stylet+D software (EPG Systems) was used for data acquisition. Aphids were lowered onto plant leaves immediately after the recording started. All EPG recordings were taken in a grounded Faraday cage. Sample size was determined by previous experience (Leybourne et al., 2019): 10 replicates for *H. defensa*-infected aphids on Concerto, 11 for *H. defensa*-infected aphids on Hsp5, 14 for uninfected aphids on Concerto, and 14 for uninfected aphids on Hsp5. For each EPG run, age-synchronised cohorts of young adult apterae were produced (between 7 and 10 days old, with each run of three EPG replicates containing aphids of the same age). Additionally, fresh plant material was used for each EPG recording (i.e. each recording consisted of a unique biological replicate consisting of one unique aphid and one unique plant).

EPG waveforms were annotated using Stylet+A software (EPG Systems, The Netherlands) by assigning waveforms to np (non-probing), C (stylet penetration/pathway; epidermal and mesophyll tissue), pd (potential drop/intracellular punctures; mesophyll tissue), the pd sub-phases (pd-III1, pd-III2, pd-III3), E1e (extracellular saliva secretion; mesophyll tissue), E1 (saliva secretion into phloem; vascular tissue), E2 (saliva secretion and passive phloem ingestion; vascular tissue), F (penetration difficulty; mesophyll tissue) or G (xylem ingestion; vascular tissue) phases (Tjallingii, 1988; Alvarez et al., 2006). Using an Excel workbook for automatic parameter calculation of EPG data (Sarria et al., 2009), annotated waveforms were converted into time-series data containing information about the duration of each waveform during the EPG run.

### Aphid fitness experiments

The aphid fitness study was split into two temporal blocks with seven fully randomised sub-blocks within each temporal block; each sub-block consisted of one replicate for each plant–aphid combination: two plant types (Hsp5, Concerto)×four aphid treatments (DL 16/04, DL 16/05, DL 16/06, DL 16/13) giving eight treatments with 14 replicates each. One apterous *R. padi* adult from the four aphid lines described above was taken from culture, placed in a Perspex clip-cage (MacGillivray and Anderson, 1957), attached to the first true leaf and left to reproduce overnight. After 24 h, the adult was removed and the resulting progeny were retained on the plant leaf; the mean mass of two nymphs was recorded at 48 h (second instar) and 114 h (fourth instar) and used to calculate the nymph mass gain over this 96 h period. We have previously characterised *R. padi* fitness in relation to *H. defensa* infection (nymph mass, fecundity, survival) and detected a fitness consequence for nymph mass gain in *H. defensa*-infected aphids (Leybourne et al., 2020). As a result, we measured the most relevant fitness parameter (nymph mass gain) in this study to allow us to estimate the effect of endosymbiont infection and host plant quality on aphid fitness. As with the EPG experiment, each replicate used in the performance experiment consisted of a unique plant replicate which had not been previously exposed to aphid infestation.

### Statistical analysis

All statistical analyses were carried out using R Studio Desktop v.1.0.143 running R v.3.4.3 (<http://www.R-project.org/>), with additional packages car v.2.1-4 (Fox and Weisberg, 2011), ggplot2 v.2.2.1 (Wickham, 2009), ggpubr v.0.1.2 (<https://CRAN.R-project.org/package=ggpubr>), lme4 v.1.1-13 (Bates et al., 2015), lmerTest v.2.0-33 (Kuznetsova et al., 2017), lsmeans v.2.27-62

(Lenth, 2016), multcomp v.1.4-8 (Hothorn et al., 2008), pastecs v.1.3.21 (<https://CRAN.R-project.org/package=pastecs>) and vegan v.2.4-6 (<https://CRAN.R-project.org/package=vegan>).

Data were combined into two endosymbiont treatments: *H. defensa* infected (comprising the DL 16/04 and DL 16/05 clonal lines) and *H. defensa* uninfected (comprising the DL 16/06 and DL 16/13 clonal lines). Aphid feeding behaviour was first assessed globally by fitting a permutational multiple analysis of variance to the dataset. Individual feeding parameters from the EPG experiment and aphid juvenile mass gain from the aphid fitness experiment were then analysed in individual linear mixed effects models. Within each model, aphid clonal line was included as a nested factor within endosymbiont infection status to account for the use of four independently initiated clonal lines of the same multilocus genotype which contain differential endosymbiont infection status, as done previously (Leybourne et al., 2020). For the individual EPG parameters, EPG run (blocking factor) and the EPG probe used were included as random factors (there were three EPG probes used over the lifetime of the experiment). For the juvenile mass gain model, experimental block and temporal block were incorporated as random factors. All data were modelled against host plant, aphid endosymbiont infection status and their interaction.  $\chi^2$  analysis of deviance tests was used to analyse the final models for the individual EPG parameters and analysis of variance with type III Satterthwaite

approximation for degrees of freedom was used to analyse the final aphid fitness model. Calculation of the least squares means was used as a *post hoc* test on all models with a significant interaction term. All final models were checked for model suitability by observing the fitted-residual plots.

## RESULTS

We obtained 72 individual feeding parameters from the EPG analysis (displayed in Tables 1 and 2; Tables S1 and S2). Global analysis of aphid feeding patterns indicated that aphid feeding behaviour was significantly affected by plant identity ( $F_{1,43}=3.19$ ;  $P=0.017$ ) and the interaction between endosymbiont presence and plant identity ( $F_{1,43}=2.71$ ;  $P=0.037$ ). From the 72 parameters obtained, seven parameters were affected by plant identity alone (Table S1); however, these parameters are not presented or discussed in detail here as we recently characterised *R. padi* feeding responses to plant identity in a separate study (Leybourne et al., 2019). In support of hypothesis 1, a total of 11 parameters were primarily influenced by endosymbiont infection, and these were mainly associated with stylet intracellular punctures and interaction with the phloem (Table 1, Fig. 1). A further 15 parameters were differentially affected by the endosymbiont infection $\times$ host plant interaction (supporting hypothesis 2), and these involved stylet interactions with the plant surface, the

**Table 1. Aphid feeding and probing parameters that were significantly affected by the absence or presence of *Hamiltonella defensa* infection**

| Response variable assessed (transformation used)                                                           | <i>Hamiltonella defensa</i> infection      |                                             | Statistical results (linear mixed effects models) |           |                  |                     |                             |           |
|------------------------------------------------------------------------------------------------------------|--------------------------------------------|---------------------------------------------|---------------------------------------------------|-----------|------------------|---------------------|-----------------------------|-----------|
|                                                                                                            | Absent ( $n=28$ )                          | Present ( $n=21$ )                          | Plant                                             |           | Endosymbiont     |                     | Plant $\times$ endosymbiont |           |
| Mean duration of each C (mesophyll pathway) phase (sqrt) (s)                                               | 860.14 $\pm$ 94.77 (28)                    | 620.02 $\pm$ 70.71 (21)                     | $\chi^2_1=0.25$                                   | $P=0.611$ | $\chi^2_1=4.16$  | $P=0.041^*$         | $\chi^2_1=0.97$             | $P=0.323$ |
| Total number of pd (intracellular punctures) (sqrt)                                                        | 72.85 $\pm$ 6.83 (28)                      | 163.57 $\pm$ 26.02 (21)                     | $\chi^2_1=0.52$                                   | $P=0.470$ | $\chi^2_1=18.49$ | $P\leq 0.001^{***}$ | $\chi^2_1=3.78$             | $P=0.051$ |
| Mean duration of each pd (not transformed) (s)                                                             | 4.53 $\pm$ 0.17 (28)                       | 2.66 $\pm$ 0.28 (21)                        | $\chi^2_1=0.03$                                   | $P=0.843$ | $\chi^2_1=40.99$ | $P\leq 0.001^{***}$ | $\chi^2_1=0.74$             | $P=0.389$ |
| Time from start of aphid probe into plant tissue to first pd (not transformed) (s)                         | 529.41 $\pm$ 206.43 (28)                   | 117.75 $\pm$ 36.49 (21)                     | $\chi^2_1=2.09$                                   | $P=0.147$ | $\chi^2_1=2.87$  | $P=0.008^{**}$      | $\chi^2_1=1.58$             | $P=0.208$ |
| Total number of pd in first hour (sqrt)                                                                    | 15.35 $\pm$ 2.29 (28)                      | 61.52 $\pm$ 14.58 (21)                      | $\chi^2_1=0.02$                                   | $P=0.871$ | $\chi^2_1=14.67$ | $P=0.001^{***}$     | $\chi^2_1=1.25$             | $P=0.262$ |
| Mean duration of each pd in first hour (not transformed) (s)                                               | 4.19 $\pm$ 0.29 (28)                       | 2.39 $\pm$ 0.32 (21)                        | $\chi^2_1=0.01$                                   | $P=0.977$ | $\chi^2_1=16.62$ | $P\leq 0.001^{***}$ | $\chi^2_1=0.001$            | $P=0.994$ |
| Mean duration of each pd in second hour (not transformed) (s)                                              | 4.81 $\pm$ 0.30 (21)                       | 3.14 $\pm$ 0.47 (17)                        | $\chi^2_1=0.59$                                   | $P=0.439$ | $\chi^2_1=10.01$ | $P=0.001^{***}$     | $\chi^2_1=1.62$             | $P=0.202$ |
| Mean duration of each pd in sixth hour (not transformed) (s)                                               | 4.84 $\pm$ 0.19 (13)                       | 3.57 $\pm$ 0.29 (13)                        | $\chi^2_1=0.92$                                   | $P=0.335$ | $\chi^2_1=5.13$  | $P=0.023^*$         | $\chi^2_1=4.32$             | $P=0.057$ |
| Time spent in E1 as a percentage of total time spent in all phloem phases (not transformed) $^\ddagger$    | 16.37%<br>LQR: 6.90%<br>UQR: 45.61% (26)   | 8.93%<br>LQR: 4.63%<br>UQR: 22.12% (20)     | $\chi^2_1=1.13$                                   | $P=0.285$ | $\chi^2_1=18.20$ | $P\leq 0.001^{***}$ | $\chi^2_1=2.02$             | $P=0.154$ |
| E2 index (not transformed) $^\ddagger$                                                                     | 29.44%<br>LQR: 5.25%<br>UQR: 76.85% (24)   | 41.36%<br>LQR: 8.95%<br>UQR: 78.67% (20)    | $\chi^2_1=0.01$                                   | $P=0.987$ | $\chi^2_1=6.72$  | $P=0.009^{**}$      | $\chi^2_1=0.94$             | $P=0.329$ |
| % E2 phases which contained a period of sustained (>10 min) phloem ingestion (not transformed) $^\ddagger$ | 45.00%<br>LQR: 27.08%<br>UQR: 100.00% (20) | 100.00%<br>LQR: 50.00%<br>UQR: 100.00% (17) | $\chi^2_1=0.37$                                   | $P=0.541$ | $\chi^2_1=3.21$  | $P=0.047^*$         | $\chi^2_1=0.90$             | $P=0.341$ |

Feeding and probing parameter abbreviations: C, stylet penetration/pathway phase; pd, potential drop/intracellular punctures; E1, saliva secretion into phloem; E2, saliva secretion and passive phloem ingestion.

Data for feeding and probing parameters are means $\pm$ s.e.m. Numbers in parentheses indicate the number of individuals which displayed each parameter, and the total number of individuals tested is indicated at the top of the column. Data marked with a double-dagger ( $^\ddagger$ ) display median alongside the upper and lower interquartile ranges (UQR and LQR, respectively).

Asterisks indicate the level of statistical significance: \* $P<0.05$ , \*\* $P<0.01$ , \*\*\* $P<0.001$ .

**Table 2. Aphid feeding and probing parameters that were differentially affected by plant type and *H. defensa* infection**

| Response variable assessed (transformation used)                              | <i>H. defensa</i> infection—plant type combination     |                                                      |                                                      | Statistical results (linear mixed effects models)    |               |              |                    |
|-------------------------------------------------------------------------------|--------------------------------------------------------|------------------------------------------------------|------------------------------------------------------|------------------------------------------------------|---------------|--------------|--------------------|
|                                                                               | Absent—Concerto (n=14)                                 | Present—Concerto (n=10)                              | Absent—Hsp5 (n=14)                                   | Present—Hsp5 (n=11)                                  | Plant         | Endosymbiont | Plant×endosymbiont |
| % Time spent probing the plant tissue (not transformed) <sup>‡</sup>          | 91.66% <sup>a,b</sup><br>LQR: 91.66<br>UQR: 93.82 (14) | 93.68% <sup>a</sup><br>LQR: 91.68<br>UQR: 95.45 (10) | 97.89% <sup>a</sup><br>LQR: 93.32<br>UQR: 99.53 (14) | 89.15% <sup>b</sup><br>LQR: 75.04<br>UQR: 98.78 (11) | $\chi^2=0.09$ | $P=0.752$    | $\chi^2=0.548$     |
| Total time spent probing plant tissue (not transformed) (s)                   | 19,048.02±474.76 <sup>a</sup> (14)                     | 19,792.08±248.27 <sup>a</sup> (10)                   | 19,647.97±444.58 <sup>a</sup> (14)                   | 16,376.19±1664.46 <sup>b</sup> (11)                  | $\chi^2=2.08$ | $P=0.148$    | $\chi^2=6.84$      |
| Number of C (mesophyll pathway) phases (sqrt)                                 | 12.85±1.96 <sup>a,b</sup> (14)                         | 10.50±1.51 <sup>a,b</sup> (10)                       | 8.50±1.26 <sup>a</sup> (14)                          | 17.18±4.53 <sup>b</sup> (11)                         | $\chi^2=0.03$ | $P=0.846$    | $\chi^2=4.40$      |
| Number of brief probes (<3 min) into plant tissue (sqrt)                      | 1.35±0.30 <sup>a</sup> (11)                            | 0.50±0.26 <sup>b</sup> (3)                           | 0.78±0.23 <sup>a,b</sup> (7)                         | 1.36±0.38 <sup>a,b</sup> (7)                         | $\chi^2=0.02$ | $P=0.878$    | $\chi^2=5.03$      |
| Number of probes into plant tissue (not transformed)                          | 6.57±1.06 <sup>a</sup> (14)                            | 4.30±0.74 <sup>a,b</sup> (10)                        | 3.99±0.73 <sup>b</sup> (14)                          | 6.36±1.02 <sup>a,b</sup> (11)                        | $\chi^2=0.88$ | $P=0.347$    | $\chi^2=6.04$      |
| Total duration of first probe into plant tissue (not transformed) (s)         | 4004.58±1585.71 <sup>a,b</sup> (14)                    | 6790.5±2413.59 <sup>a</sup> (10)                     | 7499.64±2138.37 <sup>a</sup> (14)                    | 1307.63±399.07 <sup>b</sup> (11)                     | $\chi^2=0.03$ | $P=0.845$    | $\chi^2=5.93$      |
| Number of probes into plant tissue in the second hour (log)                   | 2.00±3.77 <sup>b</sup> (14)                            | 1.30±0.21 <sup>a,b</sup> (10)                        | 1.21±0.15 <sup>a</sup> (14)                          | 2.09±0.43 <sup>b</sup> (11)                          | $\chi^2=0.19$ | $P=0.657$    | $\chi^2=5.70$      |
| Total time spent not probing plant tissue (sqrt) (s)                          | 2222.85±455.44 <sup>a,b</sup> (14)                     | 1348.83±210.27 <sup>a,b</sup> (10)                   | 1190.47±453.83 <sup>a</sup> (14)                     | 3174.05±1051.14 <sup>b</sup> (11)                    | $\chi^2=0.07$ | $P=0.780$    | $\chi^2=3.89$      |
| Total number of non-probing phases (not transformed)                          | 5.57±1.06 <sup>a</sup> (14)                            | 3.30±0.74 <sup>a,b</sup> (10)                        | 2.92±0.73 <sup>b</sup> (14)                          | 5.36±1.02 <sup>a,b</sup> (11)                        | $\chi^2=0.88$ | $P=0.347$    | $\chi^2=6.04$      |
| Number of probes into plant tissue until first E phase (phloem contact) (log) | 2.50±0.34 <sup>a</sup> (14)                            | 1.80±0.29 <sup>a</sup> (10)                          | 2.57±0.71 <sup>a</sup> (14)                          | 5.00±1.10 <sup>b</sup> (11)                          | $\chi^2=4.87$ | $P=0.027$    | $\chi^2=7.56$      |
| Time from first probe into plant tissue until first E2 phase (sqrt) (s)       | 12,284.97±2033.97 <sup>a</sup> (11)                    | 5243.38±1634.65 <sup>b</sup> (10)                    | 127,729.06±1975.25 <sup>a</sup> (9)                  | 15,901.41±1786.35 <sup>a</sup> (7)                   | $\chi^2=7.77$ | $P=0.005$    | $\chi^2=9.11$      |
| Total time spent in E2 phase (not transformed) (s)                            | 5879.69±1660.46 <sup>a,b</sup> (14)                    | 8042.94±1749.09 <sup>a</sup> (10)                    | 7369.52±1561.35 <sup>a</sup> (12)                    | 4934.72±1281.47 <sup>b</sup> (10)                    | $\chi^2=0.05$ | $P=0.820$    | $\chi^2=4.27$      |
| Longest period of E2 (not transformed) (s)                                    | 4800±1562.49 <sup>a,b</sup> (14)                       | 6256.68±1530.16 <sup>a,b</sup> (10)                  | 6237.50±1504.46 <sup>a</sup> (12)                    | 2941.27±944.83 <sup>b</sup> (10)                     | $\chi^2=0.08$ | $P=0.771$    | $\chi^2=3.93$      |
| Total number of pd in the third hour (sqrt)                                   | 15.71±4.16 <sup>a</sup> (11)                           | 10.40±3.00 <sup>a</sup> (7)                          | 16.35±3.57 <sup>a</sup> (12)                         | 54.27±18.85 <sup>b</sup> (10)                        | $\chi^2=7.30$ | $P=0.006$    | $\chi^2=7.82$      |
| Total number of pd in the fourth hour (sqrt)                                  | 14.85±4.70 <sup>a,b</sup> (8)                          | 5.10±2.75 <sup>a</sup> (3)                           | 5.50±2.06 <sup>a</sup> (9)                           | 35.09±14.30 <sup>b</sup> (8)                         | $\chi^2=0.90$ | $P=0.341$    | $\chi^2=6.88$      |

Feeding and probing parameter abbreviations: C, stylet penetration/pathway phase; pd, potential-drop/intracellular punctures; E, observed phloem phase; E1, saliva secretion into phloem; E2, saliva secretion and passive phloem ingestion; sE2, sustained phloem ingestion.

Data for feeding and probing parameters are means±s.e.m. Numbers in parentheses indicate the total number of individuals which displayed each parameter, and the total number of individuals tested is indicated at the top of the column. Data marked with a double-dagger (‡) display median alongside the upper and lower interquartile ranges (UQR and LQR, respectively).

Letters indicate which groups are significantly different based on pairwise comparisons using differences in the least square means analysis. Asterisks indicate the level of statistical significance: \* $P<0.05$ , \*\* $P<0.01$ .

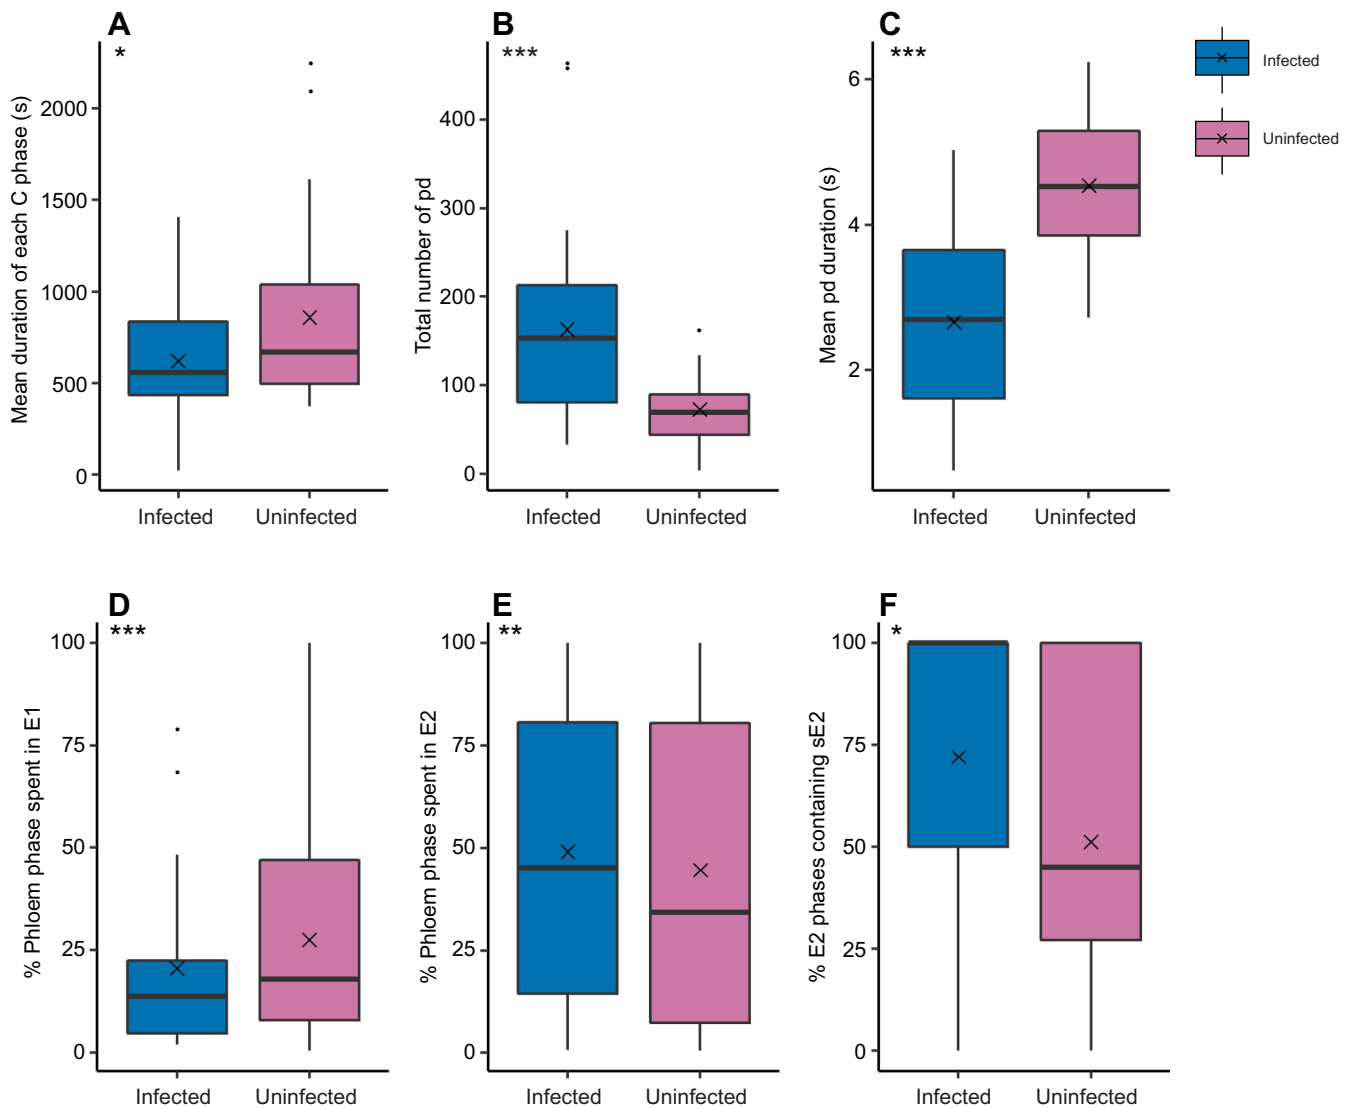

**Fig. 1. Aphid feeding parameters that were differentially affected by the presence (infected) and absence (uninfected) of *Hamiltonella defensa*.** Box plot characteristics: thick line, median; box limits, interquartile range (IQR); whiskers,  $1.5 \times$  IQR; points, outliers; black cross, mean. Infected: combined data for both *H. defensa*-infected lines (DL 16/04; DL 16/05). Uninfected: combined data for both *H. defensa*-uninfected lines (DL 16/06; DL 16/13). (A–C) Parameters associated with stylet puncturing of plant cells (intracellular punctures). (D–F) Parameters associated with stylet interaction with phloem sap. Feeding and probing parameter abbreviations: C phase, stylet penetration/pathway phase; pd, potential drop/intracellular punctures; E1, saliva secretion into phloem; E2, saliva secretion and passive phloem ingestion; sE2, sustained phloem ingestion. Asterisks indicate level of statistical significance: \* $P < 0.05$ , \*\* $P < 0.01$ , \*\*\* $P < 0.001$ . The number of replicates for each experimental group (number of aphids from which each parameter was observed at least once during the 6 h recording) is as follows: A–C:  $n = 21$  for *H. defensa*-infected aphids and  $n = 28$  for *H. defensa*-uninfected aphids; D:  $n = 20$  and  $26$  for *H. defensa*-infected and -uninfected aphids, respectively; E:  $n = 20$  and  $24$  for *H. defensa*-infected and -uninfected aphids, respectively; F:  $n = 17$  and  $20$  for *H. defensa*-infected and -uninfected aphids, respectively. Each replicate is taken from a unique aphid and represents a single biological replicate.

mesophyll tissue and the phloem (Table 2, Fig. 2). The remaining 39 non-significant parameters are displayed in Table S2.

#### More frequent cellular punctures and phloem feeding in *H. defensa*-infected aphids

During the 6 h EPG recording, 11 feeding parameters were affected similarly by endosymbiont infection for aphids feeding on Concerto and Hsp5 (Table 1), supporting our first hypothesis that infection with *H. defensa* can lead to altered aphid probing and feeding behaviour. Most of these feeding parameters related to aphid stylet activities in the mesophyll tissue, specifically the frequency and duration of the exploratory intracellular punctures (EPG waveform pd) performed by aphids while probing the plant tissue, and stylet

interaction with phloem sap. The average duration of each C phase (stylet interaction with and movement through the mesophyll tissue) was around 25–30% shorter in *H. defensa*-infected aphids compared with uninfected aphids (Table 1, Fig. 1A). The total number of intracellular punctures (pd) made by *H. defensa*-infected aphids was around twofold higher than that made by uninfected aphids (Table 1, Fig. 1B). Furthermore, following the first stylet probe into plant tissue, the first intracellular puncture (pd) occurred more rapidly for infected aphids (Table 1). Although the frequency of intracellular punctures increased in *H. defensa*-infected aphids (Table 1, Fig. 1B), the duration of these intracellular punctures was on average 50% shorter for infected aphids compared with uninfected aphids (Table 1, Fig. 1C). The frequency of these

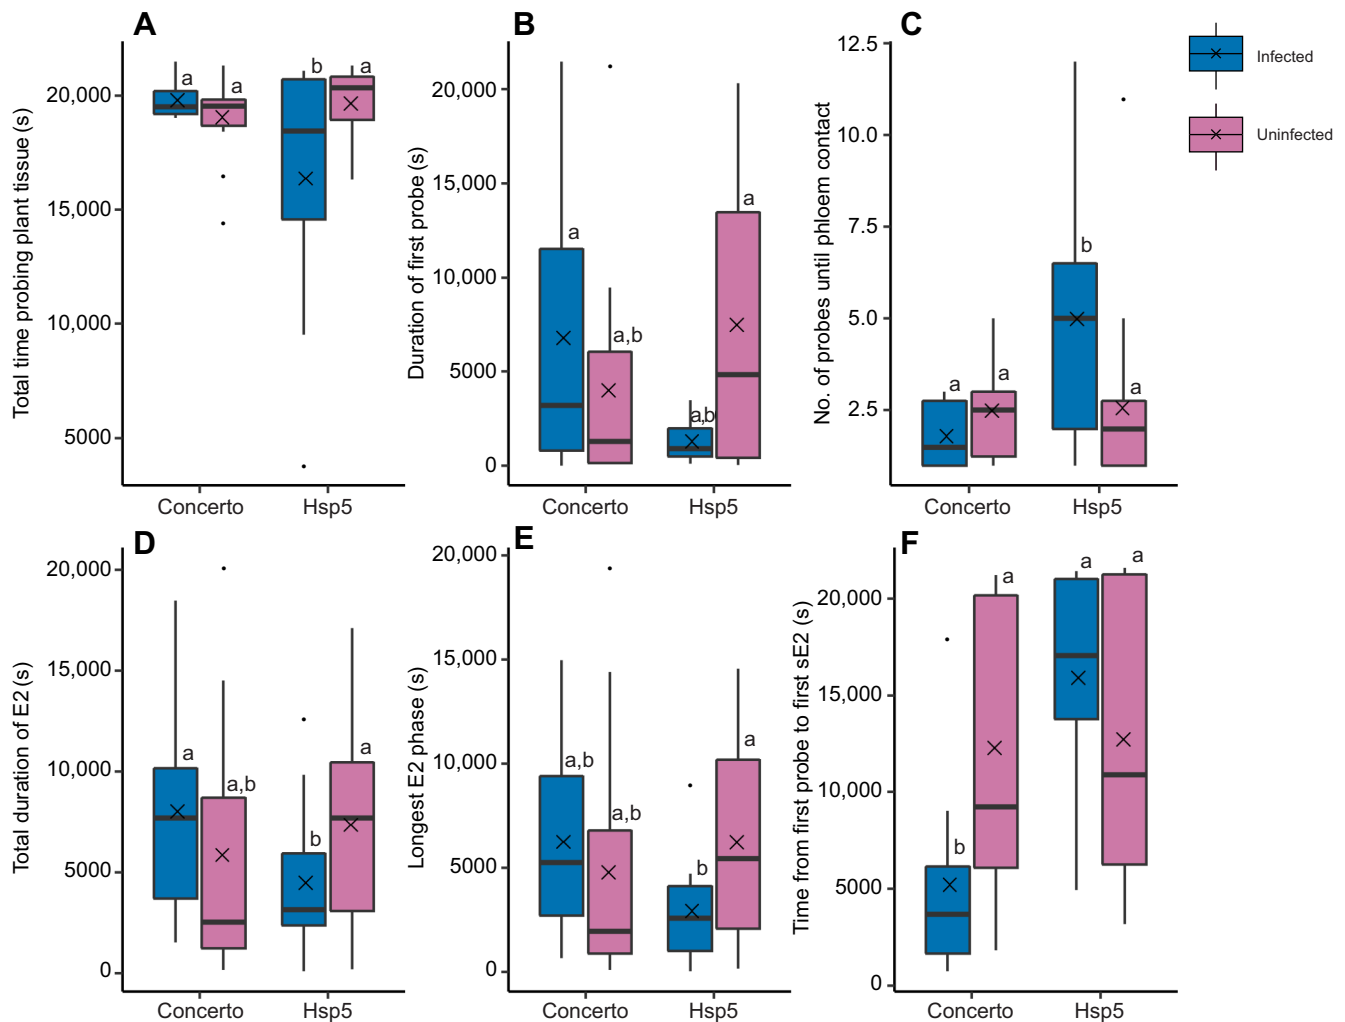

**Fig. 2. Aphid feeding parameters that were differentially affected by the presence (infected) and absence (uninfected) of *H. defensa* infection on two plant hosts.** Plant hosts were the susceptible modern barley cultivar Concerto and the wild relative Hsp5. Box plot characteristics: thick line, median; box limits, interquartile range (IQR); whiskers, 1.5× IQR; points, outliers; black cross, mean. Infected: combined data for both *H. defensa*-infected lines (DL 16/04; DL 16/05). Uninfected: combined data for both *H. defensa*-uninfected lines (DL 16/06; DL 16/13). Feeding and probing parameter abbreviations: E2, saliva secretion and passive phloem ingestion; sE2, sustained phloem ingestion. Letters indicate which groups are significantly different based on least square means comparisons. The number of replicates for each experimental group (number of aphids from which each parameter was observed at least once during the 6 h recording) is as follows: A–C:  $n=14$  for *H. defensa*-infected aphids on Concerto,  $n=14$  for *H. defensa*-uninfected aphids on Concerto,  $n=11$  for *H. defensa*-infected aphids on Hsp5 and  $n=10$  for *H. defensa*-uninfected aphids on Hsp5; D,E,  $n=14$  and 12 for *H. defensa*-infected and -uninfected aphids on Concerto, respectively, and  $n=10$  and 10 for *H. defensa*-infected and -uninfected aphids on Hsp5, respectively; F:  $n=11$  and 9 for *H. defensa*-infected and -uninfected aphids on Concerto, and  $n=7$  and 10 for *H. defensa*-infected and -uninfected aphids on Hsp5. Each replicate is taken from a unique aphid and represents a single biological replicate.

intracellular punctures was highest and their duration shortest in the first hour (Table 1). Following this, the frequency of intracellular punctures in the second to sixth hours was not affected by endosymbiont presence, although the duration of intracellular punctures was influenced by symbiont presence in the second and sixth hours of EPG monitoring (Table 1).

Three aphid feeding parameters related to stylet activity in the vascular tissue were affected by endosymbiont presence (Table 1, Fig. 1D–F): aphids infected with *H. defensa* showed a 50% reduction in time spent salivating into the phloem during stylet contact with the phloem (Table 1, Fig. 1D), displayed a 33% increase in phloem ingestion during stylet contact with the phloem (Table 1, Fig. 1E) and had a higher proportion of phloem sap ingestion phases (E2 phases) containing a period of sustained phloem sap ingestion (sE2 – a period of ingestion >10 min) (Table 1, Fig. 1F).

### Differential endosymbiont effects on aphid feeding on a partially resistant plant

In line with previous findings (Leybourne et al., 2020), the mass gain of *R. padi* nymphs was reduced when feeding on the partially resistant wild relative of barley Hsp5 compared with aphids feeding on the susceptible modern cultivar of barley Concerto (ANOVA plant species:  $F_{1,93}=122.57$ ;  $P<0.001$ ; Fig. S1), although endosymbiont presence/absence alone did not affect aphid fitness (ANOVA endosymbiont:  $F_{1,93}=0.42$ ;  $P=0.514$ ). The growth of aphids infected with *H. defensa* was further reduced by 22% when aphids were feeding on Hsp5 (ANOVA plant species×endosymbiont interaction:  $F_{1,93}=6.35$ ;  $P=0.013$ ; Fig. S1). To examine whether alterations in aphid probing and feeding behaviour contributed towards this fitness cost, we identified EPG parameters responding differentially to endosymbiont infection on each plant type.

Fifteen EPG parameters were significantly affected by the endosymbiont infection × plant type interaction (Table 2). Eleven of these were differentially affected by *H. defensa* infection for aphids probing and feeding on Hsp5 (Table 2). These data indicate that, in support of our second hypothesis, altered aphid probing and feeding behaviour could contribute towards decreased fitness of *H. defensa*-infected aphids on this less nutritious host plant (Fig. S1). When interacting with Hsp5, infected aphids spent 9% less time probing the plant tissue compared with uninfected aphids (Table 2), resulting in an overall reduction in the total time spent probing the plant tissue (Table 2, Fig. 2A). Although there was no difference in the number of non-probing phases between *H. defensa*-infected and -uninfected aphids when feeding on Hsp5 (Table 2), *H. defensa*-infected aphids spent longer periods not probing the plant tissue (Table 2). Furthermore, the duration of the first probe into plant tissue by *H. defensa*-infected aphids feeding on Hsp5 was around sixfold shorter compared with that for uninfected aphids (Table 2, Fig. 2B), and *H. defensa*-infected aphids required twice as many probes into plant tissue before the phloem was reached compared with uninfected aphids (Table 2, Fig. 2C). The total time spent ingesting phloem was reduced by 44% for *H. defensa*-infected aphids feeding on Hsp5 compared with uninfected aphids (Table 2, Fig. 2D) and the longest observed period of phloem ingestion was threefold shorter for *H. defensa*-infected aphids compared with uninfected aphids when feeding on Hsp5 (Table 2, Fig. 2E).

Infection with *H. defensa* also altered the feeding behaviour of *R. padi* when probing the susceptible barley cultivar Concerto: *H. defensa*-infected aphids achieved sustained phloem sap ingestion twofold faster than uninfected aphids (Table 2, Fig. 2F); however, this did not affect aphid growth (Fig. S1).

## DISCUSSION

By analysing aphid feeding behaviour, our study provides novel mechanistic insights into the consequences of *H. defensa* infection for interactions at the aphid–plant interface and shows that *H. defensa* infection can alter aphid probing behaviour irrespective of host plant suitability. In addition to this, our data show that these interactions can be influenced by plant susceptibility to, or resistance against, aphids and we provide novel evidence showing that aphid physiological processes are differentially affected by endosymbiont presence and host plant suitability which, at least in part, explains a fitness cost associated with *H. defensa* infection for *R. padi* when feeding on a poor quality (partially resistant) host plant. More broadly, our findings provide new information about the mechanisms by which facultative endosymbionts can influence insect physiology by altering feeding processes at the herbivore–plant interface and highlight further avenues of research which could be explored in other insect–symbiont systems.

### Endosymbiont infection alters aphid exploratory probing of plant cells and promotes phloem ingestion

When probing plant tissue, *H. defensa*-infected aphids displayed a characteristic pattern of more frequent and shorter exploratory intracellular punctures (EPG waveform pd) compared with uninfected aphids. The precise cause of this symbiont-associated effect on aphid probing is not clear, although a similar pattern was recently reported in *H. defensa*-infected cowpea aphids, *Aphis craccivora* (Angelella et al., 2018). Intracellular punctures have been associated with the transmission of non-persistent and semi-persistent plant viruses (Feres and Collar, 2001; Powell, 2005; Moreno et al., 2012) and it is likely that changes in intracellular

puncture frequency will affect the transmission of these virus types. Although *R. padi* is not a significant vector of semi-persistent or non-persistent plant viruses, it would be possible to test this hypothesis if increased frequencies of intracellular punctures were detected in other *H. defensa*-infected aphid species or other sap-feeding insect pests. For example, the cabbage aphid, *Brevicoryne brassicae*, has been reported to form facultative endosymbiont associations with *H. defensa* (Desneux et al., 2017) and is the vector for several semi-persistent and non-persistent plant viruses (Moreno et al., 2012), including cauliflower mosaic virus and turnip mosaic virus. Furthermore, infection with *H. defensa* has been reported in the whitefly species *Bemisia tabaci* (Su et al., 2015), which is a vector of multiple devastating plant viruses, including the Begomoviruses (Czosnek et al., 2017). Examining whether *H. defensa* infection alters probing behaviour in these organisms could highlight opportunities for altering the efficiency of virus vectoring by economically important insect pests.

A key difference between our study and the previous work of Angelella et al. (2018) was that *R. padi* infected with *H. defensa* (this study) also showed differential feeding behaviour caused by altered stylet activities within the phloem. *Hamiltonella defensa*-infected aphids spent less time salivating into the phloem and showed an overall increase in the percentage of phloem phases which contained phloem ingestion, including an increased proportion of phases containing periods of sustained phloem ingestion. This could potentially influence *R. padi* transmission or acquisition of phloem-limited plant viruses, such as barley yellow dwarf virus (BYDV), which are acquired during phloem ingestion and transmitted during salivation (Ng and Perry, 2004). Altered aphid probing and feeding behaviour did not appear to affect aphid fitness directly as no overall effect of *H. defensa* infection on *R. padi* growth, development, fecundity or longevity was detected (present study; Leybourne et al., 2020). However, *H. defensa* infection can affect aphid fitness in other species (Zytyńska et al., 2019 preprint) and differential feeding behaviour in *H. defensa*-infected aphids could be associated with these altered aphid phenotypes, including increased adult body mass and enhanced offspring production in black bean aphids, *Aphis fabae* (Castañeda et al., 2010). Endosymbiont-induced changes in feeding behaviour might be due to indirect effects of the bacterium on stylet activities mediated by bacterium-derived salivary factors (Su et al., 2015; Frago et al., 2017).

The extent of these endosymbiont-derived fitness consequences can often be dependent on aphid clonal line or aphid genotype (Castañeda et al., 2010) and it is important to note that endosymbiont-conferred traits vary between different aphid lines, aphid genotypes, and aphid species (Castañeda et al., 2010; Vorburger and Gousskov, 2011; Leybourne et al., 2020): indeed, *H. defensa* infection can also reduce *A. fabae* reproductive rate and survivorship (Vorburger and Gousskov, 2011) and decrease *S. avenae* fecundity (Li et al., 2018). Altered probing behaviour might also explain differential plant responses to infestation by aphids infected with *H. defensa*, including changes in the emission of Herbivore Induced Plant Volatile (HIPV) compounds (Frago et al., 2017), reduced dry matter allocation to roots (Hackett et al., 2013; Bennett et al., 2016), and reduced accumulation of salicylic and jasmonic acids (Li et al., 2019). A focus for future research should include the consequences of aphid species and genotype for *H. defensa*-associated modifications to aphid probing and feeding behaviour to fully elucidate their effects on aphid pest status, virus transmission, and plant responses to aphid infestation.



## Endosymbiont infection reduces aphid feeding on a poor quality host plant

When probing the partially-resistant plant, Hsp5, aphids infected with *H. defensa* showed a differential physiological feeding pattern compared with uninfected aphids, including a reduction in the time spent probing the plant tissue, an increase in the number of plant tissue probes required to reach the phloem tissue, and a decrease in total phloem ingestion. This was linked with decreased fitness in *H. defensa*-infected aphids compared with uninfected aphids when feeding on Hsp5, in line with our previous findings (Leybourne et al., 2020). A decrease in the duration of the first probe into plant tissue, and an overall reduction in the time spent probing the plant tissue, are representative of mesophyll- and epidermal-derived factors which inhibit and impede the penetration of the aphid stylet through the plant tissue, as highlighted by Alvarez et al. (2006). Similar fitness costs associated with *H. defensa* infection in aphids have been observed previously in *A. craccivora* (Wagner et al., 2015) and in *A. fabae* when feeding on different quality plant species (Chandler et al., 2008), although, in these cases, it is not known whether this was linked with altered aphid probing and feeding behaviour.

We recently characterised the partial-resistance mechanism of Hsp5 (Leybourne et al., 2019) and reported that partial resistance involves mesophyll and phloem traits. These include an increased expression of defensive thionins and a reduction in the availability of essential amino acids as mesophyll-derived and phloem-derived partial-resistance factors, respectively (Leybourne et al., 2019). These factors could underlie the decreased time aphids spent probing the plant tissue and the shorter duration of the initial probe into plant tissue, although the underlying processes causing these differential feeding patterns are currently unclear. A key factor which probably contributes to this decrease in aphid fitness is our observation that *H. defensa*-infected aphids showed a 44% reduction in time spent ingesting phloem on Hsp5 compared with uninfected aphids. It is probable that this substantial decrease in phloem ingestion contributed significantly to the 22% reduction in nymph growth we detected. Indeed, a previous study using the peach-potato aphid, *Myzus persicae*, showed that a 58% decrease in ingestion rate can result in a 10% reduction in aphid growth (Karley et al., 2002). We also detected differential feeding patterns between *H. defensa*-infected aphids feeding on Hsp5 and Concerto: *H. defensa*-infected aphids feeding on Concerto achieved sustained phloem feeding more rapidly than those feeding on Hsp5. A faster initiation of sustained feeding could explain the higher mass of *H. defensa*-infected nymphs on Concerto. However, it is likely that the observed reduction in nymph mass for both infected and uninfected nymphs when feeding on Hsp5 compared with those feeding on Concerto is due to the increased aphid resistance of Hsp5 (Leybourne et al., 2019). The rapid initiation of sustained feeding could be associated with other aphid fitness effects which are currently uncharacterised, such as the transmission or acquisition of phloem-limited viruses.

## Conclusion

In this study, two hypotheses were tested: (1) that infection with *H. defensa* can lead to altered aphid probing and feeding behaviour; and (2) that differential aphid probing and feeding behaviour between uninfected and *H. defensa*-infected aphids is a key contributor towards the decreased fitness of *H. defensa*-infected aphids feeding on partially resistant Hsp5. *Rhopalosiphum padi* infected with the defensive facultative endosymbiont *H. defensa* showed altered probing and feeding behaviour compared with uninfected aphids, irrespective of plant type, including an increase

in the number of intracellular punctures and in sustained phloem ingestion, supporting our first hypothesis. Furthermore, in support of our second hypothesis, we present novel EPG data providing the first demonstration of mechanisms at the aphid–plant interface which contribute towards a fitness cost arising from *H. defensa* infection in *R. padi* feeding on the partially resistant plant, Hsp5. The physiological effects of endosymbiont infection were associated with a reduction in the time aphids probe the plant tissue, an increase in the number of plant tissue probes required to reach the phloem, and a 44% reduction in total phloem ingestion. Together, our results show that aphid facultative endosymbionts can influence aphid–plant interactions in more subtle ways than previously realised and indicate that plant quality can exacerbate these effects. One pertinent question arising from our study, which is broadly applicable to all piercing and sucking insects, is whether the feeding processes associated with facultative endosymbiont infection affect insect propensity to move through the plant canopy, which has potential consequences for the level of feeding damage and virus transmission inflicted by economically important crop pests. Answering this question will be key to forecasting the dynamics of insect pests and insect-vectored viruses in the field. More broadly, our findings highlight avenues of research for other herbivorous insects to understand the processes by which facultative endosymbionts affect insect success and pest status.

## Acknowledgements

We thank A. Nicholas E. Birch (James Hutton Institute) for helpful comments on the manuscript and two anonymous reviewers for suggesting improvements to the manuscript.

## Competing interests

The authors declare no competing or financial interests.

## Author contributions

Conceptualization: D.J.L., J.I.B., A.J.K.; Methodology: D.J.L.; Formal analysis: D.J.L., T.A.V.; Investigation: D.J.L.; Writing - original draft: D.J.L.; Writing - review & editing: D.J.L., T.A.V., J.I.B., A.J.K.; Supervision: T.A.V., J.I.B., A.J.K.; Project administration: T.A.V., J.I.B., A.J.K.; Funding acquisition: J.I.B., A.J.K.

## Funding

D.J.L. was funded by the James Hutton Institute and the University of Aberdeen and University of Dundee and Dundee through a Scottish Food Security Alliance (Crops) PhD studentship. A.J.K. and T.A.V. were supported by the strategic research programme funded by the Scottish Government's Rural and Environment Science and Analytical Services Division. J.I.B. was supported by the European Research Council (310190-APHIDHOST).

## Supplementary information

Supplementary information available online at <http://jeb.biologists.org/lookup/doi/10.1242/jeb.207936.supplemental>

## References

- Alvarez, A. E., Tjallingii, W. F., Garzo, E., Vleeshouwers, V., Dicke, M. and Vosman, B. (2006). Location of resistance factors in the leaves of potato and wild tuber-bearing *Solanum* species to the aphid *Myzus persicae*. *Entomol. Exp. Appl.* **121**, 145–157. doi:10.1111/j.1570-8703.2006.00464.x
- Angeles, G., Nalam, V., Nachappa, P., White, J. and Kaplan, I. (2018). Endosymbionts differentially alter exploratory probing behavior of a nonpersistent plant virus vector. *Microb. Ecol.* **76**, 453–458. doi:10.1007/s00248-017-1133-5
- Bates, D., Mäechler, M., Bolker, B. and Walker, S. (2015). Fitting linear mixed-effects models using lme4. *J. Stat. Softw.* **67**, 1–48. doi:10.18637/jss.v067.i01
- Bennett, A. E., Millar, N. S., Gedrovics, E. and Karley, A. J. (2016). Plant and insect microbial symbionts alter the outcome of plant–herbivore–parasitoid interactions: implications for invaded, agricultural and natural systems. *J. Ecol.* **104**, 1734–1744. doi:10.1111/1365-2745.12620
- Brumin, M., Kontsedalov, S. and Ghanim, M. (2011). *Rickettsia* influences thermotolerance in the whitefly *Bemisia tabaci* B biotype. *Insect Sci.* **18**, 57–66. doi:10.1111/j.1744-7917.2010.01396.x
- Castañeda, L. E., Sandrock, C. and Vorburger, C. (2010). Variation and covariation of life history traits in aphids are related to infection with the

- facultative bacterial endosymbiont *Hamiltonella defensa*. *Biol. J. Linn. Soc.* **100**, 237–247. doi:10.1111/j.1095-8312.2010.01416.x
- Chandler, S. M., Wilkinson, T. L. and Douglas, A. E.** (2008). Impact of plant nutrients on the relationship between a herbivorous insect and its symbiotic bacteria. *Proc. R. Soc. B* **275**, 565–570. doi:10.1098/rspb.2007.1478
- Chen, D.-Q., Montllor, C. B. and Purcell, A. H.** (2000). Fitness effects of two facultative endosymbiotic bacteria on the pea aphid, *Acyrtosiphon pisum*, and the blue alfalfa aphid, *A. kondoi*. *Entomol. Exp. Appl.* **95**, 315–323. doi:10.1046/j.1570-7458.2000.00670.x
- Chesnaïs, Q. and Mauck, K. E.** (2018). Choice of tethering material influences the magnitude and significance of treatment effects in whitefly electrical penetration graph recordings. *J. Insect Behav.* **31**, 656–671. doi:10.1007/s10905-018-9705-x
- Civolani, S., Leis, M., Grandi, G., Garzo, E., Pasqualini, E., Musacchi, S., Chicca, M., Castaldelli, G., Rossi, R. and Freddy Tjallingii, W.** (2011). Stylet penetration of *Cacopsylla pyri*: an electrical penetration graph (EPG) study. *J. Insect Physiol.* **57**, 1407–1419. doi:10.1016/j.jinsphys.2011.07.008
- Czosnek, H., Hariton-Shalev, A., Sobol, I., Gorovits, R. and Ghanim, M.** (2017). The incredible journey of begomoviruses in their whitefly vector. *Viruses* **9**, 273. doi:10.3390/v9100273
- Darby, A. C. and Douglas, A. E.** (2003). Elucidation of the transmission patterns of an insect-borne bacterium. *Appl. Environ. Microbiol.* **69**, 4403–4407. doi:10.1128/AEM.69.8.4403-4407.2003
- De Clerck, C., Fujiwara, A., Jconcur, P., Léonard, S., Félix, M.-L., Francis, F., Jijkali, M. H., Tsuchida, T. and Massart, S.** (2015). A metagenomic approach from aphid's hemolymph sheds light on the potential roles of co-existing endosymbionts. *Microbiome* **3**, e63. doi:10.1186/s40168-015-0130-5
- Degnan, P. H. and Moran, N. A.** (2008). Evolutionary genetics of a defensive facultative symbiont of insects: exchange of toxin-encoding bacteriophage. *Mol. Ecol.* **17**, 916–929. doi:10.1111/j.1365-294X.2007.03616.x
- de la Peña, E., Vandomme, V. and Frago, E.** (2014). Facultative endosymbionts of aphid populations from coastal dunes of the North Sea. *Belg. J. Zool.* **144**, 41–50.
- Delp, G., Gradin, T., Åhman, I. and Jonsson, L. M. V.** (2009). Microarray analysis of the interaction between the aphid *Rhopalosiphum padi* and host plants reveals both differences and similarities between susceptible and partially resistant barley lines. *Mol. Genet. Genomics* **281**, 233–248. doi:10.1007/s00438-008-0409-3
- Desneux, N., Asplen, M. K., Brady, C. M., Heimpel, G. E., Hopper, K. R., Luo, C., Monticelli, L., Oliver, K. M. and White, J. A.** (2017). Intraspecific variation in facultative symbiont infection among native and exotic pest populations: potential implications for biological control. *Biol. Control* **116**, 27–35. doi:10.1016/j.biocontrol.2017.06.007
- Douglas, A. E. and Prosser, W. A.** (1992). Synthesis of the essential amino acid tryptophan in the pea aphid (*Acyrtosiphon pisum*) symbiosis. *J. Insect Physiol.* **38**, 565–568. doi:10.1016/0022-1910(92)90107-0
- Dunbar, H. E., Wilson, A. C. C., Ferguson, N. R. and Moran, N. A.** (2007). Aphid thermal tolerance is governed by a point mutation in bacterial symbionts. *PLoS Biol.* **5**, e96. doi:10.1371/journal.pbio.0050096
- Fereres, A. and Collar, J. L.** (2001). Chapter 5 - analysis of noncirculative transmission by electrical penetration graphs. In *Virus-Insect-Plant Interactions* (ed. K. F. Harris, O. P. Smith and J. E. Duffus), pp. 87–109. San Diego: Academic Press.
- Fox, J. and Weisberg, S.** (2011). *An {R} Companion to Applied Regression*. Thousand Oaks, CA: Sage.
- Frago, E., Mala, M., Weldegergis, B. T., Yang, C., McLean, A., Godfray, H. C. J., Gols, R. and Dicke, M.** (2017). Symbionts protect aphids from parasitic wasps by attenuating herbivore-induced plant volatiles. *Nat. Commun.* **8**, e1860. doi:10.1038/s41467-017-01935-0
- Fukatsu, T., Nikoh, N., Kawai, R. and Koga, R.** (2000). The secondary endosymbiotic bacterium of the pea aphid *Acyrtosiphon pisum* (Insecta: Homoptera). *Appl. Environ. Microbiol.* **66**, 2748–2758. doi:10.1128/AEM.66.7.2748-2758.2000
- Ghosh, S., Bouvaine, S., Richardson, S. C. W., Ghanim, M. and Maruthi, M. N.** (2018). Fitness costs associated with infections of secondary endosymbionts in the cassava whitefly species *Bemisia tabaci*. *J. Pest Sci.* **91**, 17–28. doi:10.1007/s10340-017-0910-8
- Greenslade, A. F. C., Ward, J. L., Martin, J. L., Corol, D. I., Clark, S. J., Smart, L. E. and Aradottir, G. I.** (2016). *Triticum monococcum* lines with distinct metabolic phenotypes and phloem-based partial resistance to the bird cherry-oat aphid *Rhopalosiphum padi*. *Ann. Appl. Biol.* **168**, 435–449. doi:10.1111/aab.12274
- Guo, J., Hatt, S., He, K., Chen, J., Francis, F. and Wang, Z.** (2017). Nine facultative endosymbionts in aphids. A review. *J. Asia-Pac. Entomol.* **20**, 794–801. doi:10.1016/j.aspen.2017.03.025
- Guo, J., Liu, X., Poncelet, N., He, K., Francis, F. and Wang, Z.** (2019). Detection and geographic distribution of seven facultative endosymbionts in two *Rhopalosiphum* aphid species. *MicrobiologyOpen* **8**, e00817. doi:10.1002/mbo3.817
- Hackett, S. C., Karley, A. J. and Bennett, A. E.** (2013). Unpredicted impacts of insect endosymbionts on interactions between soil organisms, plants and aphids. *Proc. R. Soc. B* **280**, e20131275. doi:10.1098/rspb.2013.1275
- Hansen, A. K. and Moran, N. A.** (2011). Aphid genome expression reveals host-symbiont cooperation in the production of amino acids. *Proc. Natl Acad. Sci. USA* **108**, 2849–2854. doi:10.1073/pnas.1013465108
- Hansen, A. K., Vorburger, C. and Moran, N. A.** (2012). Genomic basis of endosymbiont-conferred protection against an insect parasitoid. *Genome Res.* **22**, 106–114. doi:10.1101/gr.125351.111
- He, Y., Chen, L., Chen, J., Zhang, J., Chen, L., Shen, J. and Zhu, Y. C.** (2011). Electrical penetration graph evidence that pymetrozine toxicity to the rice brown planthopper is by inhibition of phloem feeding. *Pest Manag. Sci.* **67**, 483–491. doi:10.1002/ps.2098
- Henry, L. M., Maiden, M. C. J., Ferrari, J. and Godfray, H. C. J.** (2015). Insect life history and the evolution of bacterial mutualism. *Ecol. Lett.* **18**, 516–525. doi:10.1111/ele.12425
- Hothorn, T., Bretz, F. and Westfall, P.** (2008). Simultaneous inference in general parametric models. *Biom. J.* **50**, 346–363. doi:10.1002/bimj.200810425
- Karley, A. J., Douglas, A. E. and Parker, W. E.** (2002). Amino acid composition and nutritional quality of potato leaf phloem sap for aphids. *J. Exp. Biol.* **205**, 3009–3018.
- Kimmins, F. M. and Tjallingii, W. F.** (1985). Ultrastructure of sieve element penetration by aphid stylets during electrical recording. *Entomol. Exp. Appl.* **39**, 135–141. doi:10.1111/j.1570-7458.1985.tb03554.x
- Kuznetsova, A., Brockhoff, P. B. and Christensen, R. H. B.** (2017). lmerTest package: tests in linear mixed effects models. *J. Stat. Softw.* **82**, 1–26. doi:10.18637/jss.v082.i13
- Lenth, R. V.** (2016). Least-squares means: the r package lsmeans. *J. Stat. Softw.* **69**, 1–33. doi:10.18637/jss.v069.i01
- Leybourne, D. J., Valentine, T. A., Main, A. M., Pérez-Fernández, E., Robertson, J. A. H., Karley, A. J. and Bos, J. I. B.** (2019). Defence gene expression and phloem quality contribute to mesophyll and phloem resistance to aphids in wild barley. *J. Exp. Bot.* **70**, 4011–4026. doi:10.1093/jxb/erz163
- Leybourne, D. J., Bos, J. I. B., Valentine, T. A. and Karley, A. J.** (2020). The price of protection: a defensive endosymbiont impairs nymph growth in the bird cherry-oat aphid, *Rhopalosiphum padi*. *Insect Sci.* **27**, 69–85. doi:10.1111/1744-7917.12606
- Li, Q., Fan, J., Sun, J., Zhang, Y., Hou, M. and Chen, J.** (2019). Anti-plant defense response strategies mediated by the secondary symbiont *Hamiltonella defensa* in the wheat aphid *Sitobion miscanthi*. *Front. Microbiol.* **10**, 2419. doi:10.3389/fmicb.2019.02419
- Li, S., Liu, D., Zhang, R., Zhai, Y., Huang, X., Wang, D. and Shi, X.** (2018). Effects of a presumably protective endosymbiont on life-history characters and their plasticity for its host aphid on three plants. *Ecol. Evol.* **8**, 13004–13013. doi:10.1002/ece3.4754
- Łukasik, P., Dawid, M. A., Ferrari, J. and Godfray, H. C. J.** (2013a). The diversity and fitness effects of infection with facultative endosymbionts in the grain aphid, *Sitobion avenae*. *Oecologia* **173**, 985–996. doi:10.1007/s00442-013-2660-5
- Łukasik, P., van Asch, M., Guo, H., Ferrari, J. and Godfray, C. J.** (2013b). Unrelated facultative endosymbionts protect aphids against a fungal pathogen. *Ecol. Lett.* **16**, 214–218. doi:10.1111/ele.12031
- Luna, E., van Eck, L., Campillo, T., Weinroth, M., Metcalf, J., Perez-Quintero, A. L., Botha, A.-M., Thannhauser, T. W., Pappin, D. and Tisserat, N. A.** (2018). Bacteria Associated with Russian wheat aphid (*Diuraphis noxia*) enhance aphid virulence to wheat. *Phytochemistry* **2**, 151–164. doi:10.1094/PBIOMES-06-18-0027-R
- MacGillivray, M. and Anderson, G.** (1957). Three useful insect cages. *Can. Entomol.* **89**, 43–46. doi:10.4039/Ent8943-1
- Machado-Asseff, C. R. and Alvarez, A. E.** (2018). Probing behavior of aposymbiotic green peach aphid (*Myzus persicae*) on susceptible *Solanum tuberosum* and resistant *Solanum stoloniferum* plants. *Insect Sci.* **25**, 127–136. doi:10.1111/1744-7917.12372
- Manzano-Marín, A.** (2019). No evidence for *Wolbachia* as a nutritional co-obligate endosymbiont in the aphid *Pentalonia nigronervosa*. *bioRxiv* e609511. doi:10.1101/609511
- Mathé-Hubert, H., Kaech, H., Ganesanandamoorthy, P. and Vorburger, C.** (2019). Evolutionary costs and benefits of infection with diverse strains of *Spiroplasma* in pea aphids. *Evolution* **73**, 1466–1481. doi:10.1111/evo.13740
- McLean, A. H. C., Parker, B. J., Hřeček, J., Henry, L. M. and Godfray, H. C. J.** (2016). Insect symbionts in food webs. *Phil. Trans. R. Soc. B Biol. Sci.* **371**, 20150325. doi:10.1098/rstb.2015.0325
- Meseguer, A. S., Manzano-Marín, A., d'Acier, A. C., Clamens, A. L., Godefroid, M. and Jousselin, E.** (2017). *Buchnera* has changed flatmate but the repeated replacement of co-obligate symbionts is not associated with the ecological expansions of their aphid hosts. *Mol. Ecol.* **26**, 2363–2378. doi:10.1111/mec.13910
- Moran, N. A., Russell, J. A., Koga, R. and Fukatsu, T.** (2005). Evolutionary relationships of three new species of enterobacteriaceae living as symbionts of aphids and other insects. *Appl. Environ. Microbiol.* **71**, 3302–3310. doi:10.1128/AEM.71.6.3302-3310.2005
- Moreno, A., Tjallingii, W. F., Fernandez-Mata, G. and Fereres, A.** (2012). Differences in the mechanism of inoculation between a semi-persistent and a non-persistent aphid-transmitted plant virus. *J. Gen. Virol.* **93**, 662–667. doi:10.1099/vir.0.037887-0

- Morera-Margarit, P., Bulgarelli, D., Pope, T. W., Graham, R. I., Mitchell, C. and Karley, A. J.** (2019). The bacterial community associated with adult vine weevil (*Otiorhynchus sulcatus*) in UK populations growing on strawberry is dominated by *Candidatus* Nardonella. *Entomol. Exp. Appl.* **167**, 186-196. doi:10.1111/eea.12757
- Murray, G. M. and Brennan, J. P.** (2010). Estimating disease losses to the Australian barley industry. *Australas. Plant Pathol.* **39**, 85-96. doi:10.1071/AP09064
- Ng, J. C. K. and Perry, K. L.** (2004). Transmission of plant viruses by aphid vectors. *Mol. Plant Pathol.* **5**, 505-511. doi:10.1111/j.1364-3703.2004.00240.x
- Nikoh, N., Tsuchida, T., Maeda, T., Yamaguchi, K., Shigenobu, S., Koga, R. and Fukatsu, T.** (2018). Genomic insight into symbiosis-induced insect color change by a facultative bacterial endosymbiont, "*Candidatus* Rickettsiella viridis". *mBio* **9**, e00890-e00818. doi:10.1128/mBio.00890-18
- Oliver, K. M. and Higashi, C. H. V.** (2019). Variations on a protective theme: *Hamiltonella defensa* infections in aphids variably impact parasitoid success. *Curr. Opin. Insect Sci.* **32**, 1-7. doi:10.1016/j.cois.2018.08.009
- Oliver, K. M., Russell, J. A., Moran, N. A. and Hunter, M. S.** (2003). Facultative bacterial symbionts in aphids confer resistance to parasitic wasps. *Proc. Natl Acad. Sci. USA* **100**, 1803-1807. doi:10.1073/pnas.0335320100
- Oliver, K. M., Moran, N. A. and Hunter, M. S.** (2006). Costs and benefits of a superinfection of facultative symbionts in aphids. *Proc. R. Soc. B* **273**, 1273-1280. doi:10.1098/rspb.2005.3436
- Oliver, K. M., Smith, A. H. and Russell, J. A.** (2014). Defensive symbiosis in the real world – advancing ecological studies of heritable, protective bacteria in aphids and beyond. *Funct. Ecol.* **28**, 341-355. doi:10.1111/1365-2435.12133
- Perry, K. L., Kolb, F. L., Sammons, B., Lawson, C., Cisar, G. and Ohm, H.** (2000). Yield effects of *Barley yellow dwarf virus* in soft red winter wheat. *Phytopathology* **90**, 1043-1048. doi:10.1094/PHTYO.2000.90.9.1043
- Ponder, K. L., Pritchard, J., Harrington, R. and Bale, J. S.** (2000). Difficulties in location and acceptance of phloem sap combined with reduced concentration of phloem amino acids explain lowered performance of the aphid *Rhopalosiphum padi* on nitrogen deficient barley (*Hordeum vulgare*) seedlings. *Entomol. Exp. Appl.* **97**, 203-210. doi:10.1046/j.1570-7458.2000.00731.x
- Powell, G.** (2005). Intracellular salivation is the aphid activity associated with inoculation of non-persistently transmitted viruses. *J. Gen. Virol.* **86**, 469-472. doi:10.1099/vir.0.80632-0
- Prado, E. and Tjallingii, W. F.** (1994). Aphid activities during sieve element punctures. *Entomol. Exp. Appl.* **72**, 157-165. doi:10.1111/j.1570-7458.1994.tb01813.x
- Russell, J. A. and Moran, N. A.** (2006). Costs and benefits of symbiont infection in aphids: variation among symbionts and across temperatures. *Proc. R. Soc. B* **273**, 603-610. doi:10.1098/rspb.2005.3348
- Sakurai, M., Koga, R., Tsuchida, T., Meng, X.-Y. and Fukatsu, T.** (2005). *Rickettsia* Symbiont in the Pea Aphid *Acyrtosiphon pisum*: novel cellular tropism, effect on host fitness, and interaction with the essential symbiont *Buchnera*. *Appl. Environ. Microbiol.* **71**, 4069-4075. doi:10.1128/AEM.71.7.4069-4075.2005
- Sarria, E., Cid, M., Garzo, E. and Fereres, A.** (2009). Excel Workbook for automatic parameter calculation of EPG data. *Comput. Electron. Agric.* **67**, 35-42. doi:10.1016/j.compag.2009.02.006
- Sasaki, T., Hayashi, H. and Ishikawa, H.** (1991). Growth and reproduction of the symbiotic and aposymbiotic pea aphids, *Acyrtosiphon pisum* maintained on artificial diets. *J. Insect Physiol.* **37**, 749-756. doi:10.1016/0022-1910(91)90109-D
- Shigenobu, S., Watanabe, H., Hattori, M., Sakaki, Y. and Ishikawa, H.** (2000). Genome sequence of the endocellular bacterial symbiont of aphids *Buchnera* sp. *APS. Nature* **407**, 81-86. doi:10.1038/35024074
- Simon, A. L., Wellham, P. A. D., Aradottir, G. I. and Gange, A. C.** (2017). Unravelling mycorrhiza-induced wheat susceptibility to the English grain aphid *Sitobion avenae*. *Sci. Rep.* **7**, 46497. doi:10.1038/srep46497
- Skaljic, M., Kirfel, P., Grotmann, J. and Vilcinskas, A.** (2018). Fitness costs of infection with *Serratia symbiotica* are associated with greater susceptibility to insecticides in the pea aphid *Acyrtosiphon pisum*. *Pest Manag. Sci.* **74**, 1829-1836. doi:10.1002/ps.4881
- Sochard, C., Leclair, M., Simon, J.-C. and Outreman, Y.** (2019). Host plant effects on the outcomes of defensive symbioses in the pea aphid complex. *Evol. Ecol.* **33**, 651-669. doi:10.1007/s10682-019-10005-4
- Su, Q., Oliver, K. M., Xie, W., Wu, Q., Wang, S. and Zhang, Y.** (2015). The whitefly-associated facultative symbiont *Hamiltonella defensa* suppresses induced plant defences in tomato. *Funct. Ecol.* **29**, 1007-1018. doi:10.1111/1365-2435.12405
- Tjallingii, W. F.** (1978). Electronic recording of penetration behaviour by aphids. *Entomol. Exp. Appl.* **24**, 721-730. doi:10.1111/j.1570-7458.1978.tb02836.x
- Tjallingii, W. F.** (1985). Electrical nature of recorded signals during stylet penetration by aphids. *Entomol. Exp. Appl.* **38**, 177-186. doi:10.1111/j.1570-7458.1985.tb03516.x
- Tjallingii, W.** (1988). Electrical recording of stylet penetration activities. In *Aphids: Their Biology, Natural Enemies and Control* (ed. M. AK and H. P), pp. 95-108. Amsterdam, The Netherlands: Elsevier.
- Tjallingii, W. F. and Esch, H.** (1993). Fine structure of aphid stylet routes in plant tissues in correlation with EPG signals. *Physiol. Entomol.* **18**, 317-328. doi:10.1111/j.1365-3032.1993.tb00604.x
- Tjallingii, W. F., Garzo, E. and Fereres, A.** (2010). New structure in cell puncture activities by aphid stylets: a dual-mode EPG study. *Entomol. Exp. Appl.* **135**, 193-207. doi:10.1111/j.1570-7458.2010.00983.x
- Tsuchida, T., Koga, R., Horikawa, M., Tsunoda, T., Maoka, T., Matsumoto, S., Simon, J.-C. and Fukatsu, T.** (2010). Symbiotic bacterium modifies aphid body color. *Science* **330**, 1102-1104. doi:10.1126/science.1195463
- Van Emden, H. F. and Harrington, R.** (2017). *Aphids as Crop Pests*. Wallingford: CABI Publishing.
- Vorburger, C. and Gousskov, A.** (2011). Only helpful when required: a longevity cost of harbouring defensive symbionts. *J. Evol. Biol.* **24**, 1611-1617. doi:10.1111/j.1420-9101.2011.02292.x
- Wagner, S. M., Martinez, A. J., Ruan, Y.-M., Kim, K. L., Lenhart, P. A., Dehnel, A. C., Oliver, K. M. and White, J. A.** (2015). Facultative endosymbionts mediate dietary breadth in a polyphagous herbivore. *Funct. Ecol.* **29**, 1402-1410. doi:10.1111/1365-2435.12459
- Wickham, H.** (2009). *ggplot2: Elegant Graphics for Data Analysis*. New York: Springer-Verlag.
- Wulff, J. A. and White, J. A.** (2015). The endosymbiont *Arsenophonus* provides a general benefit to soybean aphid (Hemiptera: Aphididae) regardless of host plant resistance (Rag). *Environ. Entomol.* **44**, 574-581. doi:10.1093/ee/nvv031
- Zadoks, J. C., Chang, T. T. and Konzak, C. F.** (1974). A decimal code for the growth stages of cereals. *Weed Research* **14**, 415-421. doi:10.1111/j.1365-3180.1974.tb01084.x
- Zhu, Y.-X., Song, Y.-L., Zhang, Y.-K., Hoffmann, A. A., Zhou, J.-C., Sun, J.-T. and Hong, X.-Y.** (2018). Incidence of facultative bacterial endosymbionts in spider mites associated with local environments and host plants. *Appl. Environ. Microbiol.* **84**, e02546-e02517. doi:10.1128/AEM.02546-17
- Zytynska, S. E. and Meyer, S. T.** (2019). Effects of biodiversity in agricultural landscapes on the protective microbiome of insects – a review. *Entomol. Exp. Appl.* **167**, 2-13. doi:10.1111/eea.12751
- Zytynska, S. E. and Weisser, W. W.** (2016). The natural occurrence of secondary bacterial symbionts in aphids. *Ecol. Entomol.* **41**, 13-26. doi:10.1111/een.12281
- Zytynska, S. E., Thighiouart, K. and Frago, E.** (2019). A meta-analysis on the benefits and costs of hosting secondary endosymbionts in sap-sucking insects. *bioRxiv* 563031. doi:10.1101/563031
